# Supplementary material for: On the Nature of the Partial Covalent Bond between Noble Gas Elements and Noble Metal Atoms
Source: MDPI journal article supplement (doi:10.3390/molecules28073253), 2023-04-05
Supplement: s1 [file s1]

# On the Nature of the Partial Covalent Bond between Noble Gas Elements and Noble Metal Atoms

Ranita Pal <sup>1</sup> and Pratim Kumar Chattaraj <sup>2,\*</sup>

<sup>1</sup> Advanced Technology Development Centre, Indian Institute of Technology, Kharagpur 721302, India

<sup>2</sup> Department of Chemistry, Indian Institute of Technology, Kharagpur 721302, India

\* Correspondence: pkc@chem.iitkgp.ac.in

## SUPPLIMENTARY INFORMATION

**Table S1.** EDA results of NgMO (M = Cu, Ag, Au) complexes considering Ng as one fragment and MO as another fragment at the PBE-D3/QZ4P//CCSD(T)/VTZ level. All energy terms are in kcal/mol. (The values within the parentheses are in percentage and show the contribution toward the total attractive interaction,  $\Delta E_{\text{elstat}} + \Delta E_{\text{orb}} + \Delta E_{\text{disp}}$ ). [Reprinted from Ref. [76] with permission from John Wiley and Sons. © 2015 Wiley Periodicals, Inc.]

| Systems | $\Delta E_{\text{int}}$ | $\Delta E_{\text{elstat}}$ | $\Delta E_{\text{orb}}$ | $\Delta E_{\text{Pauli}}$ | $\Delta E_{\text{disp}}$ |
|---------|-------------------------|----------------------------|-------------------------|---------------------------|--------------------------|
| ArCuO   | -6.66                   | -15.4 (49.3)               | -15.7 (50.2)            | 24.6                      | -0.1 (0.4)               |
| KrCuO   | -8.91                   | -19.3 (50.3)               | -18.9 (49.2)            | 29.5                      | -0.2 (0.4)               |
| XeCuO   | -12.93                  | -25.2 (49.9)               | -25.1 (49.7)            | 37.5                      | -0.2 (0.4)               |
| RnCuO   | -14.07                  | -25.3 (49.6)               | -25.4 (50.0)            | 36.9                      | -0.22 (0.4)              |
| ArAgO   | -4.44                   | -8.0 (50.6)                | -7.6 (47.7)             | 11.4                      | -0.2 (1.7)               |
| KrAgO   | -6.63                   | -12.8 (52.9)               | -11.1 (45.9)            | 17.5                      | -0.29 (1.2)              |
| XeAgO   | -10.14                  | -21.3 (55.5)               | -16.9 (43.8)            | 28.3                      | -0.29 (0.8)              |
| RnAgO   | -11.56                  | -23.1 (55.8)               | -17.9 (43.3)            | 29.9                      | -0.37 (0.9)              |
| ArAuO   | -6.66                   | -17.0 (49.3)               | -17.2 (40.1)            | 27.7                      | -0.21 (0.6)              |
| KrAuO   | -9.81                   | -25.0 (51.4)               | -23.4 (48.1)            | 38.8                      | -0.25 (0.5)              |
| XeAuO   | -14.83                  | -37.8 (53.4)               | -32.7 (46.2)            | 56.0                      | -0.28 (0.4)              |
| RnAuO   | -16.58                  | -40.1 (53.8)               | -34.1 (45.8)            | 57.8                      | -0.35 (0.5)              |

**Table S2.** EDA results of the NgMCN (M = Cu, Ag, Au) clusters with Ng and MCN as fragments calculated at the PBE-D3/QZ4P//CCSD(T)/def2-TZVPPD level. All energy terms are in kcal/mol. (The percentage values within the parentheses show the contribution toward the total attractive interaction,  $\Delta E_{\text{elstat}} + \Delta E_{\text{orb}} + \Delta E_{\text{disp}}$ ). [Reprinted from Ref. [75] with permission from John Wiley and Sons. © 2015 Wiley Periodicals, Inc.]

| <b>Systems</b> | $\Delta E_{\text{int}}$ | $\Delta E_{\text{elstat}}$ | $\Delta E_{\text{orb}}$ | $\Delta E_{\text{Pauli}}$ | $\Delta E_{\text{disp}}$ |
|----------------|-------------------------|----------------------------|-------------------------|---------------------------|--------------------------|
| ArCuCN         | -8.5                    | -11.6 (45.5)               | -13.7 (53.7)            | 16.9                      | -0.2 (0.8)               |
| KrCuCN         | -11.0                   | -15.0 (47.0)               | -16.7 (52.4)            | 20.9                      | -0.2 (0.6)               |
| XeCuCN         | -15.5                   | -18.7 (45.9)               | -21.7 (53.3)            | 25.2                      | -0.3 (0.7)               |
| RnCuCN         | -16.6                   | -19.9 (46.2)               | -22.9 (53.1)            | 26.6                      | -0.3 (0.7)               |
| ArAgCN         | -5.2                    | -7.0 (47.3)                | -7.5 (50.7)             | 9.7                       | -0.3 (2.0)               |
| KrAgCN         | -7.5                    | -11.2 (49.8)               | -10.9 (48.4)            | 15.0                      | -0.4 (1.8)               |
| XeAgCN         | -11.0                   | -17.1 (52.0)               | -15.4 (46.8)            | 21.9                      | -0.4 (1.2)               |
| RnAgCN         | -12.4                   | -19.7 (52.8)               | -17.1 (45.8)            | 24.9                      | -0.5 (1.3)               |
| ArAuCN         | -7.9                    | -16.1 (48.6)               | -16.7 (50.5)            | 25.2                      | -0.3 (0.9)               |
| KrAuCN         | -11.1                   | -22.4 (50.7)               | -21.5 (48.6)            | 33.2                      | -0.3 (0.7)               |
| XeAuCN         | -16.1                   | -32.3 (52.5)               | -28.8 (46.8)            | 45.4                      | -0.4 (0.7)               |
| RnAuCN         | -17.8                   | -35.2 (53.1)               | -30.6 (46.2)            | 48.5                      | -0.5 (0.8)               |

**Table S3.** Electron density descriptors (au) at the bond critical points (BCPs) in between Ng and M atoms in NgMCN obtained from the wave functions generated at the MP2/def2-TZVPPD/WTBS//CCSD(T)/def2-TZVPPD level (All electron WTBS basis set is used only for Ag, Au, Xe, and Rn). [Reprinted from Ref. [75] with permission from John Wiley and Sons. © 2015 Wiley Periodicals, Inc.]

| <b>Systems</b> | <b>BCP</b> | $\rho(r_c)$ | $\nabla^2\rho(r_c)$ | $G(r_c)$ | $V(r_c)$ | $H(r_c)$ | $G(r_c)/\rho(r_c)$ |
|----------------|------------|-------------|---------------------|----------|----------|----------|--------------------|
| ArCuCN         | Ar-Cu      | 0.046       | 0.229               | 0.063    | -0.07    | -0.007   | 1.37               |
| KrCuCN         | Kr-Cu      | 0.049       | 0.198               | 0.058    | -0.067   | -0.009   | 1.184              |
| XeCuCN         | Xe-Cu      | 0.052       | 0.132               | 0.047    | -0.061   | -0.014   | 0.904              |
| RnCuCN         | Rn-Cu      | 0.053       | 0.109               | 0.042    | -0.057   | -0.015   | 0.792              |
| ArAgCN         | Ar-Ag      | 0.028       | 0.141               | 0.034    | -0.033   | 0.001    | 1.214              |
| KrAgCN         | Kr-Ag      | 0.033       | 0.146               | 0.038    | -0.039   | -0.001   | 1.152              |
| XeAgCN         | Xe-Ag      | 0.034       | 0.138               | 0.036    | -0.037   | -0.001   | 1.059              |
| RnAgCN         | Rn-Ag      | 0.036       | 0.13                | 0.035    | -0.038   | -0.003   | 0.972              |
| ArAuCN         | Ar-Au      | 0.046       | 0.244               | 0.062    | -0.063   | -0.001   | 1.348              |
| KrAuCN         | Kr-Au      | 0.05        | 0.222               | 0.06     | -0.065   | -0.005   | 1.2                |
| XeAuCN         | Xe-Au      | 0.046       | 0.195               | 0.052    | -0.056   | -0.004   | 1.13               |
| RnAuCN         | Rn-Au      | 0.046       | 0.175               | 0.048    | -0.053   | -0.005   | 1.043              |

**Table S4.** Electron density descriptors (au) at the BCPs in between Ng and M centers obtained from the wave functions generated at the MP2/cc-pVTZ/WTBS//CCSD(T)/VTZ level (All electron WTBS basis set is used only for Ag,

Au, Xe, and Rn). [Reprinted from Ref. [76] with permission from John Wiley and Sons. © 2015 Wiley Periodicals, Inc.]

| Systems | BCP   | $\rho(r_c)$ | $\nabla^2\rho(r_c)$ | $G(r_c)$ | $V(r_c)$ | $H(r_c)$ | $G(r_c)/\rho(r_c)$ |
|---------|-------|-------------|---------------------|----------|----------|----------|--------------------|
| ArCuO   | Ar-Cu | 0.045       | 0.271               | 0.071    | 20.075   | 20.004   | 1.578              |
| KrCuO   | Kr-Cu | 0.045       | 0.271               | 0.071    | 20.075   | 20.004   | 1.578              |
| XeCuO   | Xe-Cu | 0.043       | 0.188               | 0.052    | 20.057   | 20.005   | 1.209              |
| RnCuO   | Rn-Cu | 0.041       | 0.161               | 0.046    | 20.051   | 20.005   | 1.122              |
| ArAgO   | Ar-Ag | 0.028       | 0.147               | 0.035    | 20.034   | 0.001    | 1.250              |
| KrAgO   | Kr-Ag | 0.031       | 0.153               | 0.038    | 20.037   | 0.001    | 1.226              |
| XeAgO   | Xe-Ag | 0.037       | 0.154               | 0.041    | 20.043   | 20.002   | 1.108              |
| RnAgO   | Rn-Ag | 0.037       | 0.141               | 0.038    | 20.041   | 20.003   | 1.027              |
| ArAuO   | Ar-Au | 0.042       | 0.236               | 0.059    | 20.059   | 0.000    | 1.405              |
| KrAuO   | Kr-Au | 0.042       | 0.232               | 0.058    | 20.057   | 0.001    | 1.381              |
| XeAuO   | Xe-Au | 0.047       | 0.210               | 0.055    | 20.059   | 20.004   | 1.170              |
| RnAuO   | Rn-Au | 0.046       | 0.186               | 0.050    | 20.054   | 20.004   | 1.087              |

**Table S5.** Different topological descriptors (au) at the bond critical points (BCP) in between Ng and M atoms in NgMY and Ng<sub>2</sub>M<sub>2</sub>Y (M = Cu, Ag; Y = NO<sub>3</sub>, SO<sub>4</sub>, CO<sub>3</sub>) complexes at the MPW1B95/def2-TZVP level. [Reprinted from Ref. [77] with permission from Springer Nature. © 2016, Indian Academy of Sciences]

| Systems             | BCP   | $\rho(r_c)$ | $\nabla^2\rho(r_c)$ | $G(r_c)$ | $V(r_c)$ | $H(r_c)$ | $G(r_c)/\rho(r_c)$ |
|---------------------|-------|-------------|---------------------|----------|----------|----------|--------------------|
| ArCuNO <sub>3</sub> | Ar-Cu | 0.046       | 0.231               | 0.062    | -0.067   | -0.004   | 1.348              |
| KrCuNO <sub>3</sub> | Kr-Cu | 0.05        | 0.209               | 0.059    | -0.066   | -0.007   | 1.180              |
| XeCuNO <sub>3</sub> | Xe-Cu | 0.052       | 0.173               | 0.053    | -0.062   | -0.009   | 1.019              |
| RnCuNO <sub>3</sub> | Rn-Cu | 0.05        | 0.150               | 0.046    | -0.055   | -0.009   | 0.920              |
| ArAgNO <sub>3</sub> | Ar-Ag | 0.028       | 0.122               | 0.031    | -0.031   | 0.000    | 1.107              |
| KrAgNO <sub>3</sub> | Kr-Ag | 0.036       | 0.129               | 0.035    | -0.038   | -0.003   | 0.972              |
| XeAgNO <sub>3</sub> | Xe-Ag | 0.043       | 0.128               | 0.038    | -0.043   | -0.006   | 0.884              |
| RnAgNO <sub>3</sub> | Rn-Ag | 0.043       | 0.115               | 0.035    | -0.042   | -0.006   | 0.814              |
| ArCuSO <sub>4</sub> | Ar-Cu | 0.045       | 0.227               | 0.061    | -0.065   | -0.004   | 1.356              |
| KrCuSO <sub>4</sub> | Kr-Cu | 0.05        | 0.206               | 0.059    | -0.066   | -0.007   | 1.180              |
| XeCuSO <sub>4</sub> | Xe-Cu | 0.053       | 0.171               | 0.052    | -0.062   | -0.009   | 0.981              |
| RnCuSO <sub>4</sub> | Rn-Cu | 0.05        | 0.149               | 0.046    | -0.055   | -0.009   | 0.920              |
| ArAgSO <sub>4</sub> | Ar-Ag | 0.028       | 0.121               | 0.03     | -0.031   | 0.000    | 1.071              |
| KrAgSO <sub>4</sub> | Kr-Ag | 0.036       | 0.129               | 0.035    | -0.038   | -0.003   | 0.972              |

|                                                 |       |       |       |       |        |        |       |
|-------------------------------------------------|-------|-------|-------|-------|--------|--------|-------|
| XeAgSO <sub>4</sub>                             | Xe-Ag | 0.043 | 0.126 | 0.037 | -0.043 | -0.006 | 0.860 |
| RnAgSO <sub>4</sub>                             | Rn-Ag | 0.043 | 0.113 | 0.035 | -0.041 | -0.007 | 0.814 |
| ArCuCO <sub>3</sub>                             | Ar-Cu | 0.039 | 0.188 | 0.049 | -0.051 | -0.002 | 1.256 |
| KrCuCO <sub>3</sub>                             | Kr-Cu | 0.043 | 0.17  | 0.047 | -0.051 | -0.005 | 1.093 |
| XeCuCO <sub>3</sub>                             | Xe-Cu | 0.046 | 0.144 | 0.043 | -0.049 | -0.007 | 0.935 |
| RnCuCO <sub>3</sub>                             | Rn-Cu | 0.044 | 0.125 | 0.038 | -0.044 | -0.007 | 0.864 |
| Ar <sub>2</sub> Cu <sub>2</sub> SO <sub>4</sub> | Ar-Cu | 0.044 | 0.221 | 0.059 | -0.062 | -0.004 | 1.341 |
| Kr <sub>2</sub> Cu <sub>2</sub> SO <sub>4</sub> | Kr-Cu | 0.049 | 0.205 | 0.058 | -0.064 | -0.007 | 1.184 |
| Xe <sub>2</sub> Cu <sub>2</sub> SO <sub>4</sub> | Xe-Cu | 0.052 | 0.172 | 0.052 | -0.061 | -0.009 | 1.000 |
| Rn <sub>2</sub> Cu <sub>2</sub> SO <sub>4</sub> | Rn-Cu | 0.049 | 0.149 | 0.046 | -0.054 | -0.008 | 0.939 |
| Ar <sub>2</sub> Ag <sub>2</sub> SO <sub>4</sub> | Ar-Ag | 0.026 | 0.114 | 0.028 | -0.028 | 0.000  | 1.077 |
| Kr <sub>2</sub> Ag <sub>2</sub> SO <sub>4</sub> | Kr-Ag | 0.034 | 0.125 | 0.034 | -0.037 | -0.003 | 1.000 |
| Xe <sub>2</sub> Ag <sub>2</sub> SO <sub>4</sub> | Xe-Ag | 0.042 | 0.126 | 0.037 | -0.042 | -0.005 | 0.881 |
| Rn <sub>2</sub> Ag <sub>2</sub> SO <sub>4</sub> | Rn-Ag | 0.042 | 0.113 | 0.034 | -0.041 | -0.006 | 0.810 |
| Ar <sub>2</sub> Au <sub>2</sub> SO <sub>4</sub> | Ar-Au | 0.058 | 0.242 | 0.069 | -0.078 | -0.009 | 1.190 |
| Kr <sub>2</sub> Au <sub>2</sub> SO <sub>4</sub> | Kr-Au | 0.066 | 0.216 | 0.067 | -0.080 | -0.013 | 1.015 |
| Xe <sub>2</sub> Au <sub>2</sub> SO <sub>4</sub> | Xe-Au | 0.071 | 0.166 | 0.06  | -0.078 | -0.018 | 0.845 |
| Rn <sub>2</sub> Au <sub>2</sub> SO <sub>4</sub> | Rn-Au | 0.068 | 0.143 | 0.054 | -0.072 | -0.018 | 0.794 |
| Ar <sub>2</sub> Ag <sub>2</sub> CO <sub>3</sub> | Ar-Ag | 0.026 | 0.111 | 0.028 | -0.027 | 0.000  | 1.077 |
| Kr <sub>2</sub> Ag <sub>2</sub> CO <sub>3</sub> | Kr-Ag | 0.034 | 0.124 | 0.033 | -0.036 | -0.003 | 0.971 |
| Xe <sub>2</sub> Ag <sub>2</sub> CO <sub>3</sub> | Xe-Ag | 0.042 | 0.125 | 0.037 | -0.042 | -0.005 | 0.881 |
| Rn <sub>2</sub> Ag <sub>2</sub> CO <sub>3</sub> | Rn-Ag | 0.041 | 0.112 | 0.034 | -0.040 | -0.006 | 0.829 |
| Ar <sub>2</sub> Au <sub>2</sub> CO <sub>3</sub> | Ar-Au | 0.055 | 0.234 | 0.066 | -0.073 | -0.007 | 1.200 |
| Kr <sub>2</sub> Au <sub>2</sub> CO <sub>3</sub> | Kr-Au | 0.063 | 0.212 | 0.065 | -0.077 | -0.012 | 1.032 |
| Xe <sub>2</sub> Au <sub>2</sub> CO <sub>3</sub> | Xe-Au | 0.069 | 0.166 | 0.058 | -0.075 | -0.017 | 0.841 |
| Rn <sub>2</sub> Au <sub>2</sub> CO <sub>3</sub> | Rn-Au | 0.066 | 0.143 | 0.053 | -0.070 | -0.017 | 0.803 |

**Table S6.** Topological descriptors (au) at the line critical point between Ng and M atoms in [NgM-(bipy)]<sup>+</sup> obtained from wave function generated at the MPW1B95/cc-pVTZ/WTBS//MPW1B95/cc-pVTZ level (All electron WTBS basis set is used only for Cu, Ag, Au, Kr, Xe and Rn). [Reprinted from Ref. [85] with permission from John Wiley and Sons. © 2016 Wiley-VCH Verlag GmbH & Co. KGaA, Weinheim]

| Systems                    | $\rho(r_c)$ | $\nabla^2\rho(r_c)$ | $G(r_c)$ | $V(r_c)$ | $H(r_c)$ | $G(r_c)/\rho(r_c)$ |
|----------------------------|-------------|---------------------|----------|----------|----------|--------------------|
| [ArCu-(bipy)] <sup>+</sup> | 0.042       | 0.211               | 0.060    | -0.063   | -0.003   | 1.417              |
| [KrCu-(bipy)] <sup>+</sup> | 0.042       | 0.208               | 0.055    | -0.059   | -0.003   | 1.331              |
| [XeCu-(bipy)] <sup>+</sup> | 0.044       | 0.177               | 0.050    | -0.056   | -0.006   | 1.146              |

|                            |       |       |       |        |        |       |
|----------------------------|-------|-------|-------|--------|--------|-------|
| [RnCu-(bipy)] <sup>+</sup> | 0.042 | 0.151 | 0.044 | −0.050 | −0.006 | 1.045 |
| [ArAg-(bipy)] <sup>+</sup> | 0.029 | 0.143 | 0.035 | −0.034 | 0.001  | 1.211 |
| [KrAg-(bipy)] <sup>+</sup> | 0.036 | 0.15  | 0.039 | −0.041 | −0.002 | 1.097 |
| [XeAg-(bipy)] <sup>+</sup> | 0.038 | 0.151 | 0.040 | −0.043 | −0.003 | 1.061 |
| [RnAg-(bipy)] <sup>+</sup> | 0.038 | 0.136 | 0.037 | −0.040 | −0.003 | 0.984 |
| [ArAu-(bipy)] <sup>+</sup> | 0.045 | 0.224 | 0.057 | −0.059 | −0.001 | 1.276 |
| [KrAu-(bipy)] <sup>+</sup> | 0.048 | 0.246 | 0.063 | −0.065 | −0.002 | 1.312 |
| [XeAu-(bipy)] <sup>+</sup> | 0.052 | 0.215 | 0.059 | −0.065 | −0.006 | 1.135 |
| [RnAu-(bipy)] <sup>+</sup> | 0.051 | 0.186 | 0.053 | −0.059 | −0.006 | 1.044 |

**Table S7.** Energy decomposition analysis (EDA) results of the [NgM-(bipy)]<sup>+</sup> complexes taking Ng as one fragment and [M-(bipy)]<sup>+</sup> as another, studied at the BLYP-D3(BJ)/QZ4P//MPW1B95/cc-pVTZ level. All the energy terms are in kcal/mol. The percentage values within the parentheses show the contribution towards the total attractive interaction,  $\Delta E_{\text{elstat}} + \Delta E_{\text{orb}} + \Delta E_{\text{disp}}$ . [Reprinted from Ref. [85] with permission from John Wiley and Sons. © 2016 Wiley-VCH Verlag GmbH & Co. KGaA, Weinheim]

| Systems                    | $\Delta E_{\text{int}}$ | $\Delta E_{\text{elstat}}$ | $\Delta E_{\text{orb}}$ | $\Delta E_{\text{Pauli}}$ | $\Delta E_{\text{disp}}$ |
|----------------------------|-------------------------|----------------------------|-------------------------|---------------------------|--------------------------|
| [ArCu-(bipy)] <sup>+</sup> | −8.5                    | −15.8 (48.1%)              | −14.8 (45.1%)           | 24.3                      | −2.2 (6.8%)              |
| [KrCu-(bipy)] <sup>+</sup> | −11.1                   | −21.1 (50.1%)              | −18.2 (43.2%)           | 30.9                      | −2.8 (6.7%)              |
| [XeCu-(bipy)] <sup>+</sup> | −17.1                   | −28.0 (49.9%)              | −24.4 (43.5%)           | 38.9                      | −3.7 (6.7%)              |
| [RnCu-(bipy)] <sup>+</sup> | −18.7                   | −27.6 (49.0%)              | −24.8 (43.9%)           | 37.7                      | −4.0 (7.1%)              |
| [ArAg-(bipy)] <sup>+</sup> | −5.7                    | −8.8 (45.7%)               | −8.5 (43.9%)            | 13.6                      | −2.0 (10.5%)             |
| [KrAg-(bipy)] <sup>+</sup> | −8.5                    | −14.2 (48.7%)              | −12.4 (42.6%)           | 20.6                      | −2.5 (8.7%)              |
| [XeAg-(bipy)] <sup>+</sup> | −13.0                   | −23.6 (51.8%)              | −18.7 (40.9%)           | 32.6                      | −3.3 (7.3%)              |
| [RnAg-(bipy)] <sup>+</sup> | −15.0                   | −25.0 (51.5%)              | −20.0 (41.2%)           | 33.5                      | −3.5 (7.3%)              |
| [ArAu-(bipy)] <sup>+</sup> | −8.0                    | −19.3 (50.1%)              | −17.0 (44.0%)           | 30.5                      | −2.3 (5.8%)              |
| [KrAu-(bipy)] <sup>+</sup> | −13.2                   | −31.4 (52.1%)              | −26.0 (43.2%)           | 47                        | −2.9 (4.8%)              |
| [XeAu-(bipy)] <sup>+</sup> | −20.3                   | −46.9 (54.4%)              | −35.6 (41.3%)           | 65.9                      | −3.7 (4.3%)              |

|                            |       |               |               |      |             |
|----------------------------|-------|---------------|---------------|------|-------------|
| [RnAu-(bipy)] <sup>+</sup> | -22.9 | -48.5 (54.4%) | -36.7 (41.2%) | 66.3 | -3.9 (4.4%) |
|----------------------------|-------|---------------|---------------|------|-------------|

**Table S8.** EDA results of MNgCCH and NgMCCH at the PBE-D3(BJ)/QZ4P//CCSD(T)/cc-pVTZ level. All energy values are in kcal/mol. The values in parentheses are percentage contribution toward the total attraction,  $\Delta E_{\text{elstat}} + \Delta E_{\text{orb}} + \Delta E_{\text{disp}}$ . [Reprinted from Ref. [86] with permission from American Chemical Society. © 2017, American Chemical Society]

| Systems | Fragments     | $\Delta E_{\text{int}}$ | $\Delta E_{\text{elstat}}$ | $\Delta E_{\text{orb}}$ | $\Delta E_{\text{Pauli}}$ | $\Delta E_{\text{disp}}$ |
|---------|---------------|-------------------------|----------------------------|-------------------------|---------------------------|--------------------------|
| CuXeCCH | Cu + XeCCH    | -33.3                   | -58.6<br>(52.9)            | -51.3<br>(46.3)         | 77.5                      | -0.9 (0.8)               |
| CuRnCCH | Cu + RnCCH    | -38.1                   | -64.1<br>(54.9)            | -51.8<br>(44.3)         | 78.7                      | -0.9 (0.7)               |
| AgXeCCH | Ag + XeCCH    | -25.8                   | -40.0<br>(50.5)            | -38.2<br>(48.2)         | 53.3                      | -1.0 (1.3)               |
| AgRnCCH | Ag +<br>RnCCH | -31.1                   | -50.4<br>(54.0)            | -41.9<br>(44.9)         | 62.2                      | -1.0 (1.1)               |
| AuXeCCH | Au + XeCCH    | -38.5                   | -75.9<br>(55.2)            | -60.6<br>(44.0)         | 99.2                      | -1.1 (0.8)               |
| AuRnCCH | Au +<br>RnCCH | -45.1                   | -84.6<br>(57.4)            | -61.8<br>(41.9)         | 102.4                     | -1.1 (0.7)               |
| ArCuCCH | Ar + CuCCH    | -8.9                    | -12.3<br>(45.5)            | -14.0<br>(51.9)         | 18.1                      | -0.7 (2.6)               |
| KrCuCCH | Kr + CuCCH    | -11.2                   | -15.8<br>(47.1)            | -17.0<br>(50.5)         | 22.4                      | -0.8 (2.4)               |
| XeCuCCH | Xe + CuCCH    | -14.9                   | -19.9<br>(47.4)            | -21.1<br>(50.2)         | 27.2                      | -1.0 (2.4)               |
| RnCuCCH | Rn + CuCCH    | -15.7                   | -20.4<br>(47.3)            | -21.7<br>(50.2)         | 27.5                      | -1.0 (2.4)               |
| ArAgCCH | Ar + AgCCH    | -5.3                    | -7.2 (47.6)                | -7.2 (47.6)             | 9.9                       | -0.7 (4.8)               |
| KrAgCCH | Kr + AgCCH    | -7.5                    | -11.6<br>(50.7)            | -10.4<br>(45.5)         | 15.5                      | -0.9 (3.8)               |
| XeAgCCH | Xe + AgCCH    | -10.9                   | -17.9<br>(53.0)            | -14.8<br>(43.8)         | 22.9                      | -1.1 (3.1)               |
| RnAgCCH | Rn +<br>AgCCH | -12.1                   | -19.6<br>(53.6)            | -15.8<br>(43.4)         | 24.5                      | -1.1 (3.0)               |
| ArAuCCH | Ar + AuCCH    | -7.6                    | -13.3<br>(47.6)            | -13.8<br>(49.5)         | 20.3                      | -0.8 (2.9)               |
| KrAuCCH | Kr + AuCCH    | -10.6                   | -20.0<br>(50.3)            | -18.8<br>(47.4)         | 29.1                      | -0.9 (2.3)               |

|         |               |       |                 |                 |      |            |
|---------|---------------|-------|-----------------|-----------------|------|------------|
| XeAuCCH | Xe + AuCCH    | -15.4 | -29.8<br>(52.5) | -25.9<br>(45.5) | 41.5 | -1.1 (2.0) |
| RnAuCCH | Rn +<br>AuCCH | -16.9 | -32.3<br>(53.2) | -27.3<br>(44.9) | 43.9 | -1.2 (1.9) |

**Table S9.** Electron density descriptors (au) at the BCPs of M-Ng and Ng-C bonds in MNgCCH compounds obtained from the wave functions generated at the MP2/ccpVTZ/WTBS//CCSD(T)/cc-pVTZ level (WTBS for Cu, Ag, Au, Xe and Rn atoms). [Reprinted from Ref. [86] with permission from American Chemical Society. © 2017, American Chemical Society]

| Systems | BCP         | $\rho(r_c)$ | $\nabla^2\rho(r_c)$ | $G(r_c)$ | $V(r_c)$ | $H(r_c)$ | $G(r_c)/\rho(r_c)$ |
|---------|-------------|-------------|---------------------|----------|----------|----------|--------------------|
| CuXeCCH | Cu-•-Xe     | 0.048       | 0.155               | 0.047    | -0.1     | -0.008   | 0.979              |
| CuRnCCH | Cu-•-Rn     | 0.047       | 0.134               | 0.042    | -0.1     | -0.009   | 0.894              |
| AgXeCCH | Ag-•-Xe     | 0.038       | 0.123               | 0.034    | 0.0      | -0.003   | 0.895              |
| AgRnCCH | Ag-•-Rn     | 0.040       | 0.119               | 0.034    | 0.0      | -0.005   | 0.850              |
| AuXeCCH | Au-•-Xe     | 0.055       | 0.178               | 0.052    | -0.1     | -0.008   | 0.945              |
| AuRnCCH | Au-•-<br>Rn | 0.054       | 0.153               | 0.047    | -0.1     | -0.009   | 0.870              |

**Table S10.** Electron density descriptors (in au) calculated at the MP2/cc-pVTZ/WTBS//CCSD(T)/VTZ level. [Reprinted from Ref. [87] with permission from American Chemical Society. © 2018, American Chemical Society]

| Systems | BCP  | $\rho(r_c)$ | $\nabla^2\rho(r_c)$ | $G(r_c)$ | $V(r_c)$ | $H(r_c)$ | $G(r_c)/\rho(r_c)$ |
|---------|------|-------------|---------------------|----------|----------|----------|--------------------|
| CuCCKrH | Kr-C | 0.080       | 0.104               | 0.050    | -0.073   | -0.024   | 0.621              |
| CuCCXeH | Xe-C | 0.082       | 0.084               | 0.051    | -0.081   | -0.030   | 0.626              |
| CuCCRnH | Rn-C | 0.078       | 0.097               | 0.053    | -0.081   | -0.028   | 0.676              |
| AgCCKrH | Kr-C | 0.080       | 0.103               | 0.050    | -0.073   | -0.024   | 0.619              |
| AgCCXeH | Xe-C | 0.082       | 0.083               | 0.051    | -0.081   | -0.030   | 0.622              |
| AgCCRnH | Rn-C | 0.082       | 0.083               | 0.051    | -0.081   | -0.030   | 0.622              |
| AuCCKrH | Kr-C | 0.079       | 0.106               | 0.050    | -0.073   | -0.023   | 0.628              |
| AuCCXeH | Xe-C | 0.079       | 0.085               | 0.050    | -0.078   | -0.028   | 0.626              |
| AuCCRnH | Rn-C | 0.076       | 0.096               | 0.051    | -0.078   | -0.027   | 0.673              |
| CuCCKrH | Kr-H | 0.118       | -0.040              | 0.060    | -0.130   | -0.070   | 0.118              |
| CuCCXeH | Xe-H | 0.110       | 0.021               | 0.067    | -0.128   | -0.062   | 0.110              |
| CuCCRnH | Rn-H | 0.100       | 0.079               | 0.070    | -0.120   | -0.050   | 0.100              |

|         |      |       |        |       |        |        |       |
|---------|------|-------|--------|-------|--------|--------|-------|
| AgCCKrH | Kr-H | 0.116 | -0.034 | 0.060 | -0.128 | -0.068 | 0.116 |
| AgCCXeH | Xe-H | 0.109 | 0.022  | 0.066 | -0.127 | -0.060 | 0.109 |
| AgCCRnH | Rn-H | 0.099 | 0.079  | 0.069 | -0.119 | -0.050 | 0.099 |
| AuCCKrH | Kr-H | 0.130 | -0.075 | 0.067 | -0.153 | -0.086 | 0.130 |
| AuCCXeH | Xe-H | 0.115 | 0.020  | 0.072 | -0.140 | -0.067 | 0.115 |
| AuCCRnH | Rn-H | 0.104 | 0.085  | 0.075 | -0.130 | -0.054 | 0.104 |

**Table S11.** EDA Results of MCCNgH at the PBE-D3/QZ4P//CCSD(T)/VTZ Level. All energy values are in kcal/mol. The values in parentheses are the percentage contribution toward the total attraction,  $\Delta E_{\text{elstat}} + \Delta E_{\text{orb}} + \Delta E_{\text{disp}}$ . [Reprinted from Ref. [87] with permission from American Chemical Society. © 2018, American Chemical Society]

| Systems | Fragments                            | $\Delta E_{\text{int}}$ | $\Delta E_{\text{Pauli}}$ | $\Delta E_{\text{elstat}}$ | $\Delta E_{\text{orb}}$ | $\Delta E_{\text{disp}}$ |
|---------|--------------------------------------|-------------------------|---------------------------|----------------------------|-------------------------|--------------------------|
| CuCCKrH | CuCCKr + H                           | -27.1                   | 94.6                      | -50.3 (41.3)               | -71.3 (58.6)            | -0.1 (0.1)               |
| CuCCXeH | CuCCXe + H                           | -40.3                   | 96.0                      | -56.3 (41.3)               | -80.0 (58.7)            | -0.1 (0.1)               |
| CuCCRnH | CuCCRn + H                           | -44.3                   | 86.3                      | -55.3 (42.3)               | -75.2 (57.6)            | -0.1 (0.1)               |
| AgCCKrH | AgCCKr + H                           | -27.5                   | 91.2                      | -49.0 (41.2)               | -69.7 (58.7)            | -0.1 (0.1)               |
| AgCCXeH | AgCCXe + H                           | -39.9                   | 95.4                      | -55.8 (41.2)               | -79.4 (58.7)            | -0.1 (0.1)               |
| AgCCRnH | AgCCRn + H                           | -43.9                   | 86.1                      | -55.0 (42.3)               | -74.9 (57.6)            | -0.1 (0.1)               |
| AuCCKrH | AuCCKr + H                           | -29.5                   | 104.5                     | -54.8 (40.9)               | -79.0 (59.0)            | -0.1 (0.1)               |
| AuCCXeH | AuCCXe + H                           | -40.6                   | 101.6                     | -58.6 (41.2)               | -83.5 (58.7)            | -0.1 (0.1)               |
| AuCCRnH | AuCCRn + H                           | -44.6                   | 90.4                      | -57.3 (42.4)               | -77.7 (57.5)            | -0.1 (0.1)               |
| CuCCKrH | CuCC <sup>-</sup> + KrH <sup>+</sup> | -164.2                  | 120.0                     | -175.7 (61.8)              | -108.1 (38.0)           | -0.5 (0.2)               |
| CuCCXeH | CuCC <sup>-</sup> + XeH <sup>+</sup> | -162.4                  | 144.2                     | -195.6 (63.8)              | -110.4 (36.0)           | -0.5 (0.2)               |
| CuCCRnH | CuCC <sup>-</sup> + RnH <sup>+</sup> | -163.8                  | 139.5                     | -201.1 (66.3)              | -101.6 (33.5)           | -0.6 (0.2)               |
| AgCCKrH | AgCC <sup>-</sup> + KrH <sup>+</sup> | -165.4                  | 114.0                     | -170.9 (61.2)              | -108.0 (38.7)           | -0.4 (0.1)               |
| AgCCXeH | AgCC <sup>-</sup> + XeH <sup>+</sup> | -163.2                  | 142.5                     | -192.7 (63.0)              | -112.5 (36.8)           | -0.5 (0.2)               |
| AgCCRnH | AgCC <sup>-</sup> + RnH <sup>+</sup> | -164.6                  | 137.6                     | -197.9 (65.5)              | -103.7 (34.3)           | -0.6 (0.2)               |
| AuCCKrH | AuCC <sup>-</sup> + KrH <sup>+</sup> | -154.0                  | 109.9                     | -166.2 (63.0)              | -97.3 (36.9)            | -0.5 (0.2)               |
| AuCCXeH | AuCC <sup>-</sup> + XeH <sup>+</sup> | -153.8                  | 132.8                     | -183.8 (64.2)              | -102.1 (35.6)           | -0.6 (0.2)               |
| AuCCRnH | AuCC <sup>-</sup> + RnH <sup>+</sup> | -155.5                  | 129.0                     | -189.2 (66.5)              | -94.7 (33.3)            | -0.7 (0.2)               |
